# Supplementary material
Source: PubMed Central journal article supplement (PMC1810024)

This is an electronic appendix to the Biology Letter by Henderson 2004 Topsy punters: sauropod dinosaur pneumaticity, buoyancy and aquatic habits. *Proc. R. Soc. Lond. B (Suppl.)* **271**, S180–S183. (DOI 10.1098/rsbl.2003.0136.)

Electronic appendices are refereed with the text. However, no attempt has been made to impose a uniform editorial style on the electronic appendices.

### Electronic Appendix A

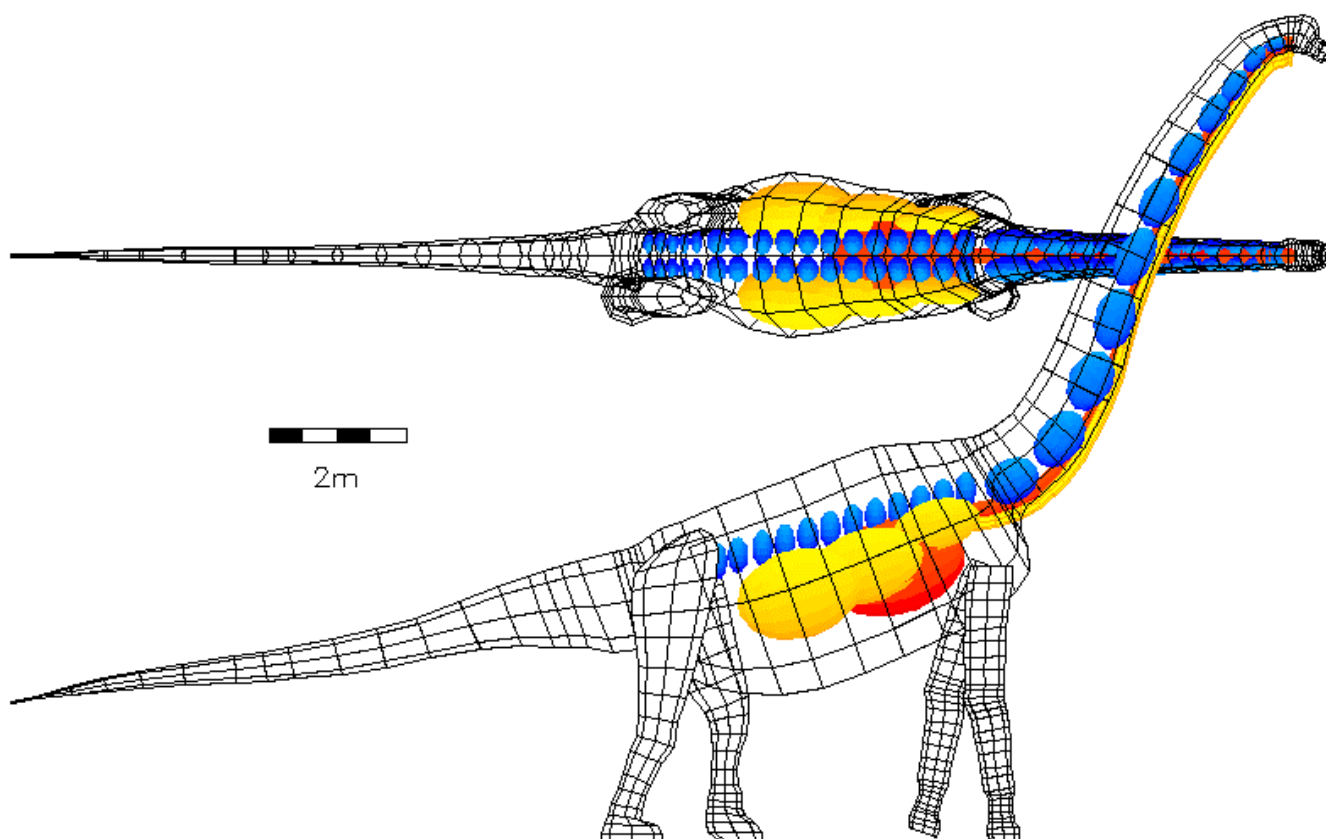

Supplement: 15252977supp.pdf [file 15252977supp.pdf]
